# Supplementary material
Source: Elsevier journal article supplement (https://www.sciencedirect.com/science/article/pii/S0025775321002104)
Supplement: mmc2 [file S0025775321002104:mmc2.doc]

**Figure S2**. Distributions of propensity score before and after matching for early administration cohort.
